# Supplementary material for: Multiscale synergetic bandgap/structure engineering for the construction of full-spectrum-responsive heterostructured MoS 2 /SnS 2 photocatalyst
Source: Royal Society of Chemistry journal article supplement (doi:10.1039/d4tc03035d), 2024-01-01
Supplement: d4tc03035d1.pdf [file d4tc03035d1.pdf]

## Supporting Information

### Multiscale Synergetic Bandgap/Structure Engineering to Construct Full-Spectrum Responsive Heterostructured MoS<sub>2</sub>/SnS<sub>2</sub> Photocatalysts

Wenjie Zhao<sup>a</sup>, Jinyan Liu<sup>a</sup>, Weiye Hou<sup>a</sup>, Zhe Zhang<sup>a</sup>, Xinrui Chen<sup>a</sup>, Xianghua Zeng<sup>a,b</sup>, Weiwei Xia<sup>a\*</sup>

<sup>a</sup> *College of Physics Science and Technology & Microelectronics Industry Research Institute, Yangzhou University, Yangzhou 225002, P.R. China*

<sup>b</sup> *College of Electrical, Energy and Power Engineering, Yangzhou University, Yangzhou 225127, P. R. China*

---

\* Corresponding authors. Email: [wwxia@yzu.edu.cn](mailto:wwxia@yzu.edu.cn)

27

28

## Supporting Information

### 29 ■ RESULTS AND DISCUSSION

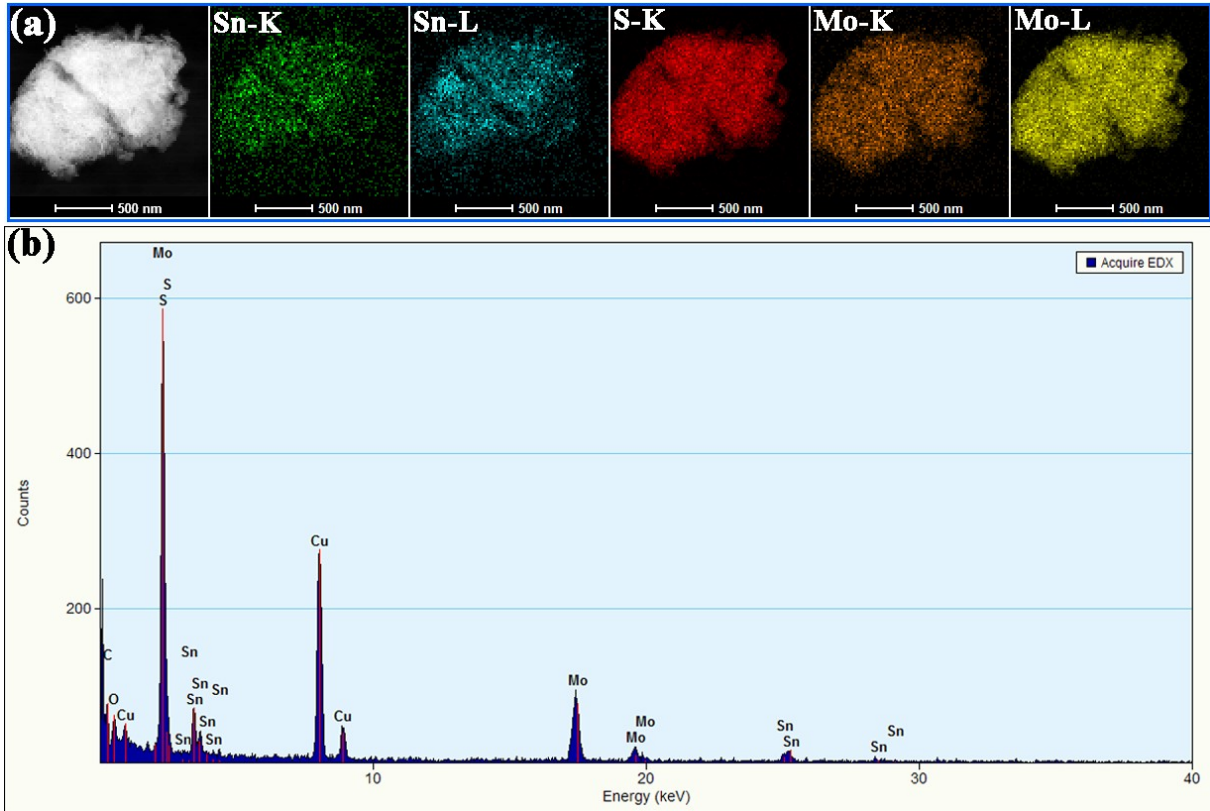

30

31

**Fig- S1.** (a) EDX elemental mapping and (b) EDX spectrum of MoS<sub>2</sub>/SnS<sub>2</sub> heterostructure.

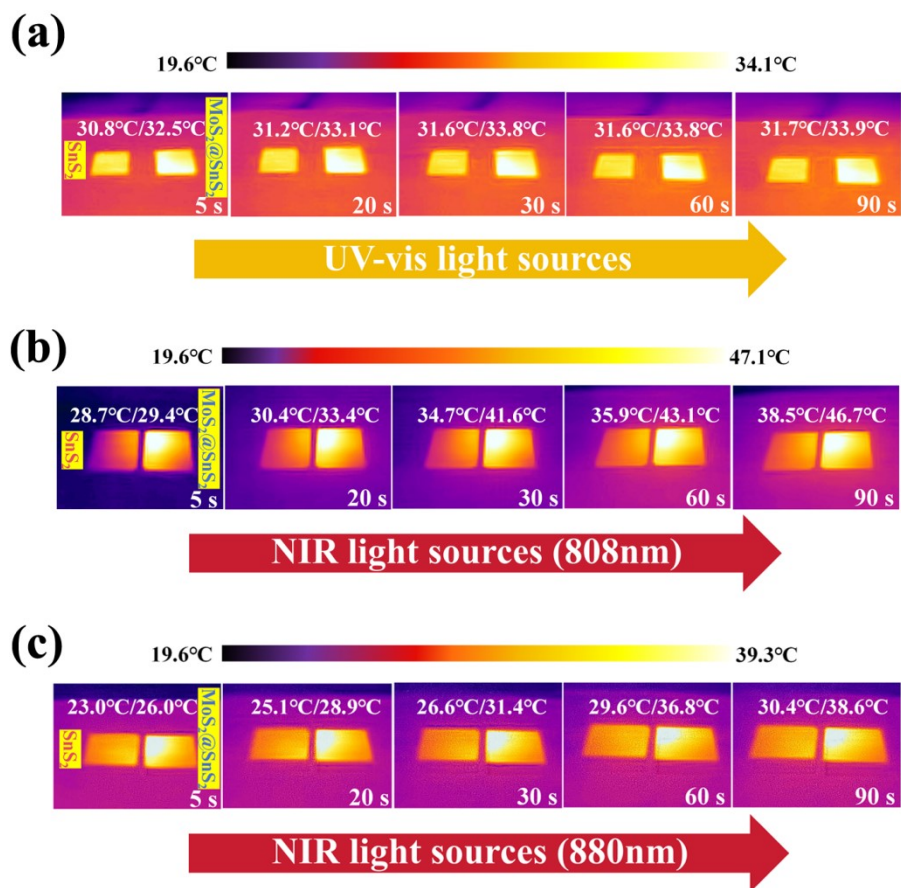

Figure S2. The time-dependent temperature and thermal image for SnS<sub>2</sub> and MoS<sub>2</sub>/SnS<sub>2</sub> under UV-vis light and NIR light (808 and 880 nm) irradiation.

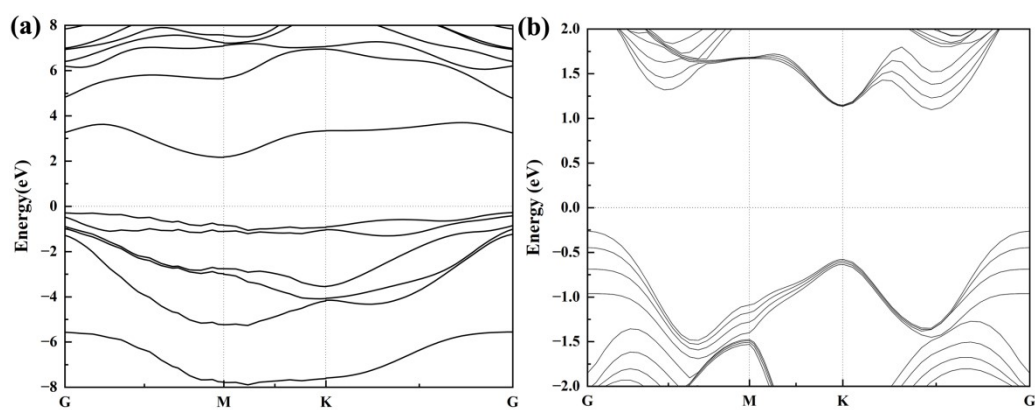

Figure S3. (a) Band structure of the original SnS<sub>2</sub> monolayer. (b) Band structure of the original MoS<sub>2</sub> multilayer.

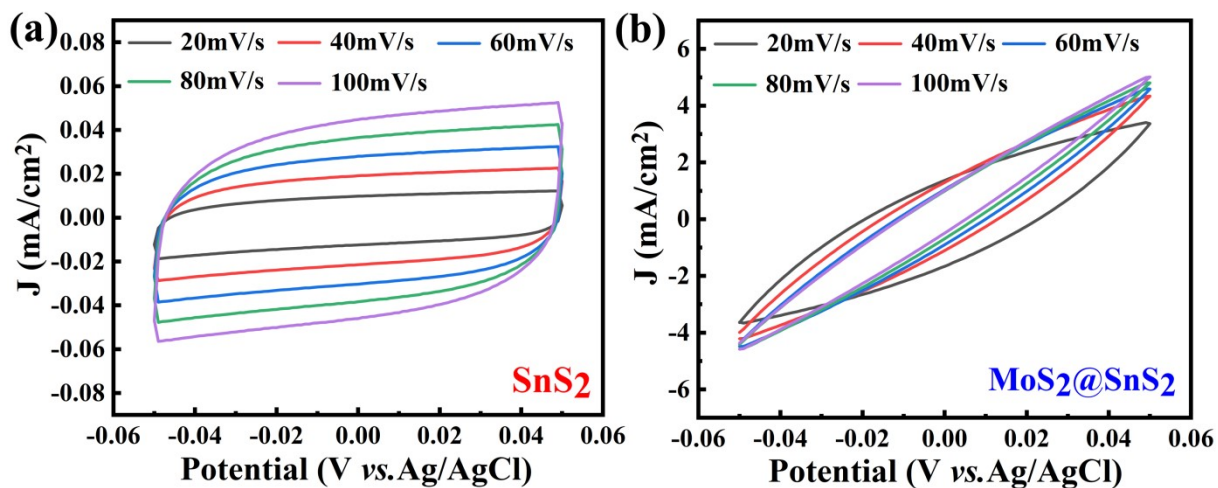

43

44

**Fig- S4.** Cyclic voltammetry (CV) of at various scan rates for (a) SnS<sub>2</sub> and (b) MoS<sub>2</sub>/SnS<sub>2</sub>.

45

46

**Table S1.** The simulated parameter values obtained by fitting the Nyquist plots.

| Samples               | SnS <sub>2</sub> | MoS <sub>2</sub> @SnS <sub>2</sub> |
|-----------------------|------------------|------------------------------------|
| R <sub>s</sub> (ohm)  | 7.94             | 8.94                               |
| R <sub>ct</sub> (ohm) | 566.8            | 3.56                               |
| CPE1(mF)              | 912.71           | 685.86                             |

47
